# Supplementary material for: Aluminium-induced reduction of plant growth in alfalfa (Medicago sativa) is mediated by interrupting auxin transport and accumulation in roots
Source: PubMed Central journal article supplement (PMC4951802; doi:10.1038/srep30079), 2016-07-20
Supplement: srep30079-s1.pdf [file srep30079-s1.pdf]

Aluminium-induced reduction of plant growth in alfalfa (*Medicago sativa*) is mediated by interrupting auxin transport and accumulation in roots

Shengyin Wang<sup>1</sup>, Xiaoyan Ren<sup>1</sup>, Bingru Huang<sup>2</sup>, Ge Wang<sup>3</sup>, Peng Zhou<sup>1\*</sup>,  
Yuan An<sup>1, 4\*</sup>

<sup>1</sup> School of Biological and Agricultural Science, Shanghai Jiao Tong University, Shanghai 200240, P. R. China

<sup>2</sup> Department of Plant Biology and Pathology, Rutgers, The State University of New Jersey, New Jersey, NJ 08901, USA

<sup>3</sup> Instrumental Analysis centre of Shanghai Jiao Tong University, Shanghai Jiao Tong University, Shanghai 200240, P. R. China

<sup>4</sup> Key Laboratory of Urban Agriculture (South), Ministry of Agriculture, Shanghai 201101, China

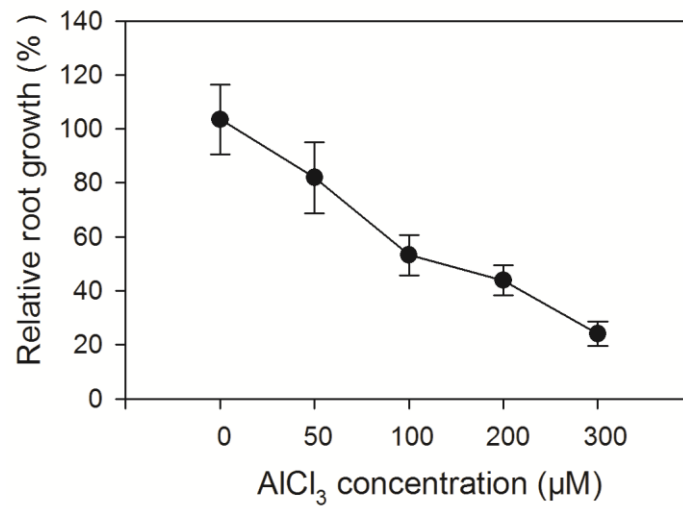

Supplementary Figure 1. The length of primary roots of alfalfa seedlings grown for 48h on ½-strength Hoagland's medium (pH 4.5) containing 0, 50, 100, 200 and 300 µM AlCl<sub>3</sub>. Data are presented as relative root elongation compared with control values. Data are means ±SE of eight replicates. Bars with different letters indicate significant difference at  $P < 0.05$  (least significant difference test).

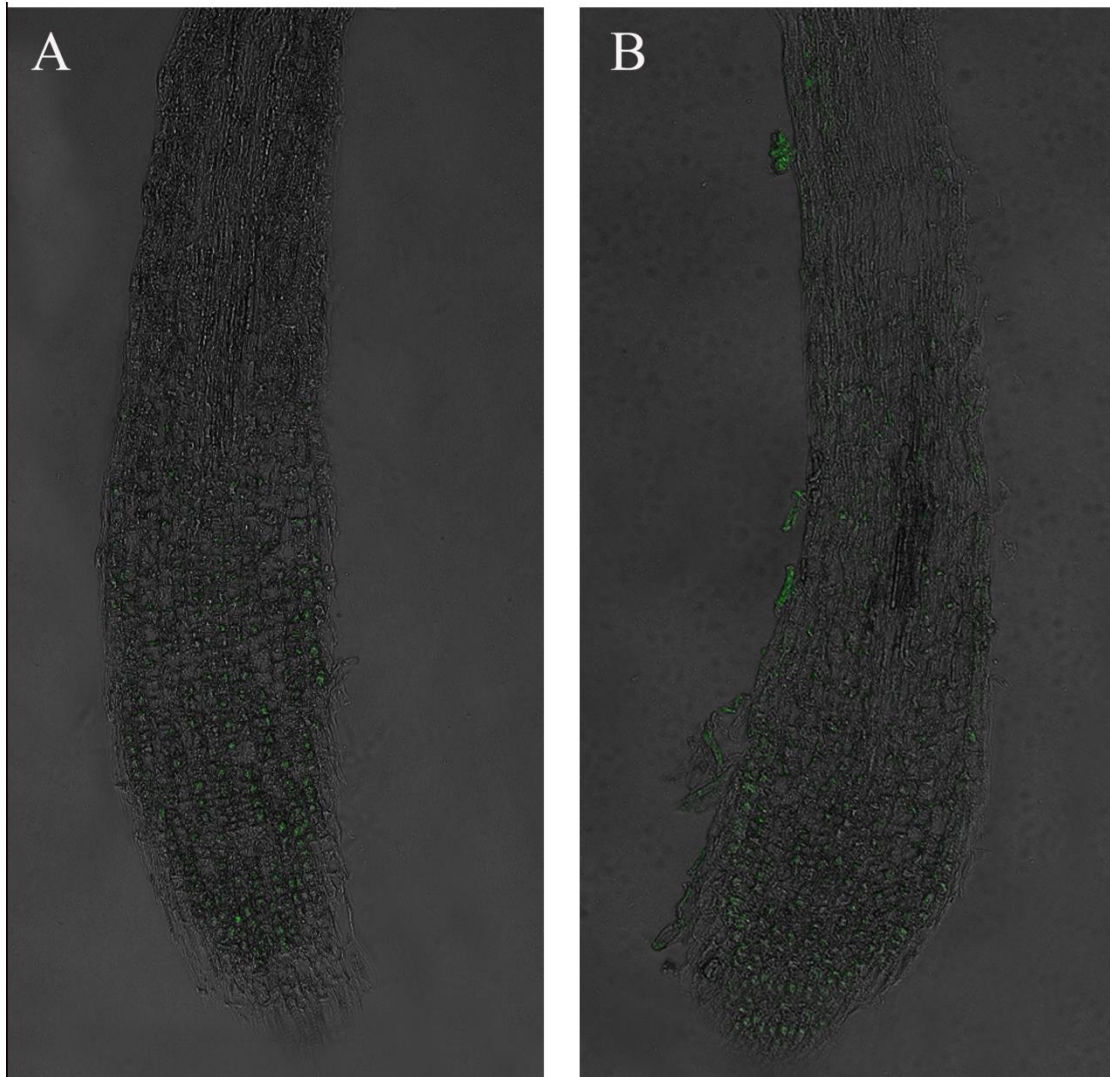

Supplementary Figure 2. Blank control (A) and negative control of IAA Immunolocalization in middle longitudinal section of alfalfa seedlings grown for 1d on  $\frac{1}{2}$ -strength Hoagland's medium (pH 4.5) with treatments of no aluminum (-Al)(A), aluminum stress (Al)(B) ( $100 \mu\text{M AlCl}_3$ ). Scale bars in each image indicated  $100 \mu\text{m}$ .
